# Supplementary material
Source: HighWire-hosted journal article supplement (https://jitc.bmj.com/content/7/1/82)
Supplement: media-1 [file media-1.pdf]

# **SUPPLEMENTARY FIGURES**

**Knudson, et al. Mechanisms involved in  
IL-15 superagonist enhancement of  
anti-PD-L1 therapy**

| <b>Antibody</b> | <b>Clone</b> | <b>Company</b>          |
|-----------------|--------------|-------------------------|
| FoxP3           | R16-715      | BD Biosciences          |
| CD62L           | MEL-14       | BD Biosciences          |
| CD44            | IM7          | BD Biosciences          |
| CD3 $\epsilon$  | 2C11         | BD Biosciences          |
| CD247           | MIH5         | BD Biosciences          |
| CD11b           | M1/70        | BD Biosciences          |
| IFN $\gamma$    | XMG1.2       | BD Biosciences          |
| TNF $\alpha$    | MPG-XT22     | BD Biosciences          |
| CD8 $\alpha$    | 53-6.7       | ThermoFisher Scientific |
| Ki67            | SolA15       | ThermoFisher Scientific |
| FoxP3           | FJK-16s      | ThermoFisher Scientific |
| NKp46           | 29A1.4       | ThermoFisher Scientific |
| NKG2D           | CX5          | ThermoFisher Scientific |
| CD279           | J43          | ThermoFisher Scientific |
| CD8 $\beta$     | 53-5.8       | Biolegend               |
| Ly6C            | HK1.4        | Biolegend               |
| Ly6G            | 1A8          | Biolegend               |
| CD49b           | DX5          | Biolegend               |
| CD45.2          | 104          | Biolegend               |
| CD4             | RM4-4        | Biolegend               |
| CD4             | RM4-5        | Biolegend               |
| Granzyme B      | GB11         | Invitrogen              |

**Table S1. List of flow cytometry antibodies used for analysis of murine immune cell populations.**

| <b>Cell Population</b>            | <b>Flow Cytometry Gating Strategy</b>                                                       |
|-----------------------------------|---------------------------------------------------------------------------------------------|
| CD8 <sup>+</sup> T Cells          | Live/CD45.2 <sup>+</sup> /CD3 $\epsilon$ <sup>+</sup> /CD8 $\alpha$ <sup>+</sup>            |
| CD4 <sup>+</sup> T Cells          | Live/CD45.2 <sup>+</sup> /CD3 $\epsilon$ <sup>+</sup> /CD4 <sup>+</sup> /FoxP3 <sup>-</sup> |
| CD4 <sup>+</sup> T <sub>reg</sub> | Live/CD45.2 <sup>+</sup> /CD3 $\epsilon$ <sup>+</sup> /CD4 <sup>+</sup> /FoxP3 <sup>+</sup> |
| NK Cells                          | Live/CD45.2 <sup>+</sup> /CD3 $\epsilon$ <sup>-</sup> /CD49b <sup>+</sup>                   |
| G-MDSC/Granulocytes               | Live/CD45.2 <sup>+</sup> /CD11b <sup>+</sup> /Ly6C <sup>lo</sup> /Ly6G <sup>hi</sup>        |
| M-MDSC/Monocytes                  | Live/CD45.2 <sup>+</sup> /CD11b <sup>+</sup> /Ly6C <sup>hi</sup> /Ly6G <sup>lo</sup>        |
| CD45 <sup>+</sup> Cells           | Live/CD45.2 <sup>+</sup>                                                                    |
| CD45 <sup>-</sup> Cells           | Live/CD45.2 <sup>-</sup>                                                                    |

**Table S2. Flow cytometry gating strategy used for identification of murine immune cell populations.**

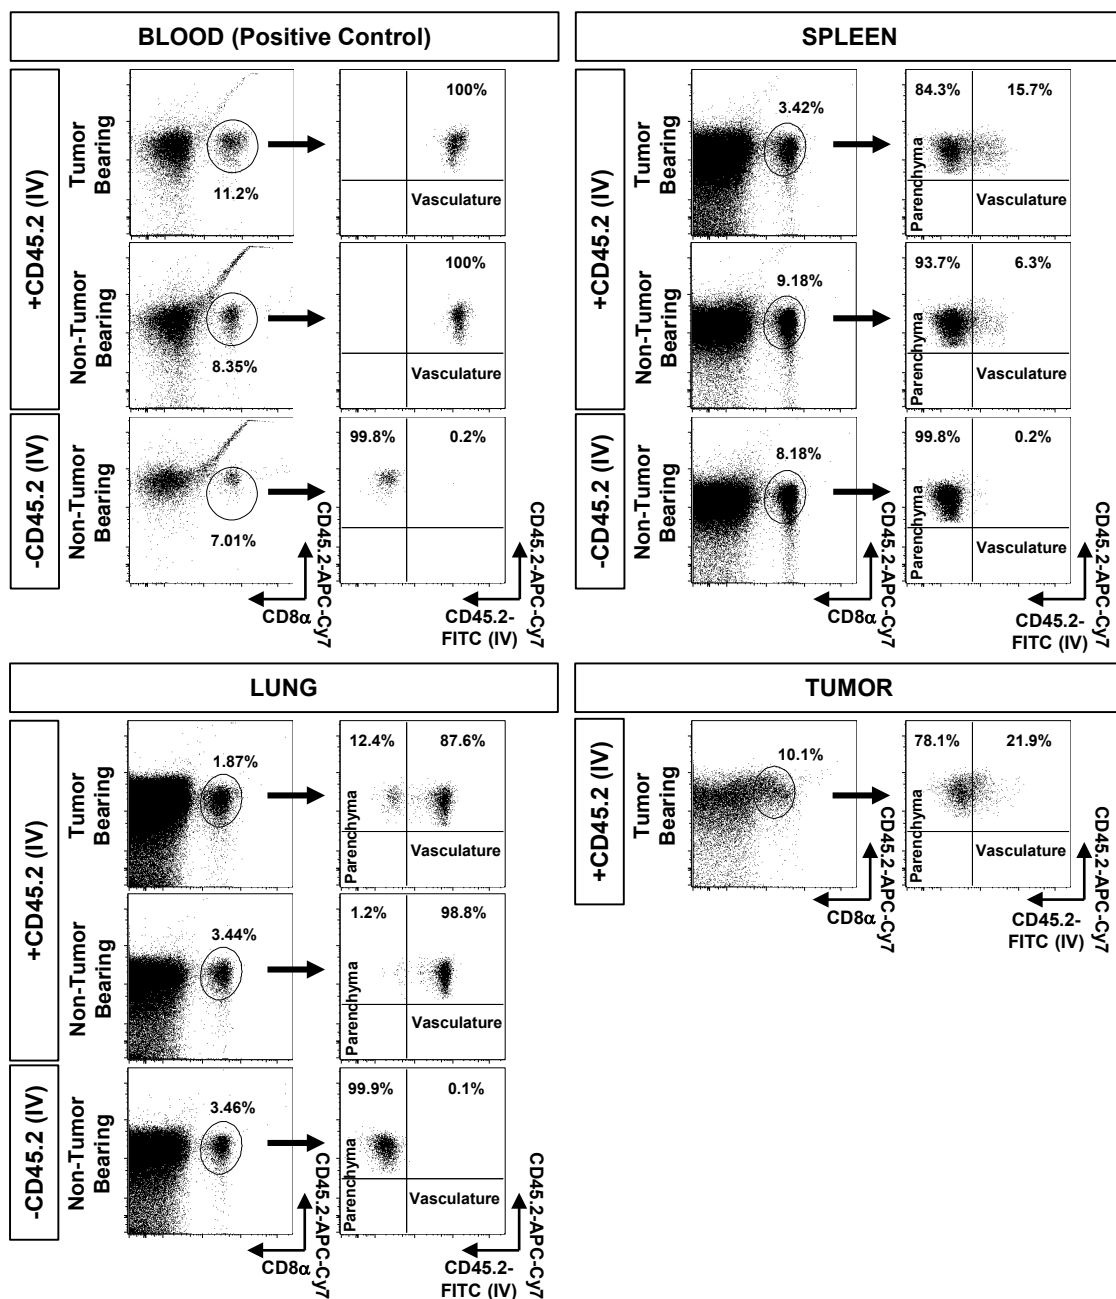

**Figure S1. Validation of intravascular CD45-antibody labeling for the discrimination of vascular-versus parenchymal-resident immune cells in the spleen, lung, and primary tumor.** 4T1 tumor implant was performed as in Figure 1. Intravascular labeling of all hematopoietic cells using an anti-CD45.2-FITC antibody was performed. Dot plots show examples of CD8 $\alpha$ <sup>+</sup> T cell populations in the blood (positive control), spleen, lung, and tumor from i.v.-labeled 4T1 tumor-bearing mice and i.v.-labeled and i.v.-non-labeled naïve (non-tumor bearing) control mice after subsequent staining with anti-CD45.2-APC-Cy7 and immune related markers. Lung parenchyma-resident immune cells were identified as CD45.2-APC-Cy7<sup>+</sup>/CD45.2-FITC<sup>-</sup> and lung vascular-resident immune cells were identified as CD45.2-APC-Cy7<sup>+</sup>/CD45.2-FITC<sup>+</sup>. Data representative of 5 independent experiments, n=4-5 mice/group per experiment.

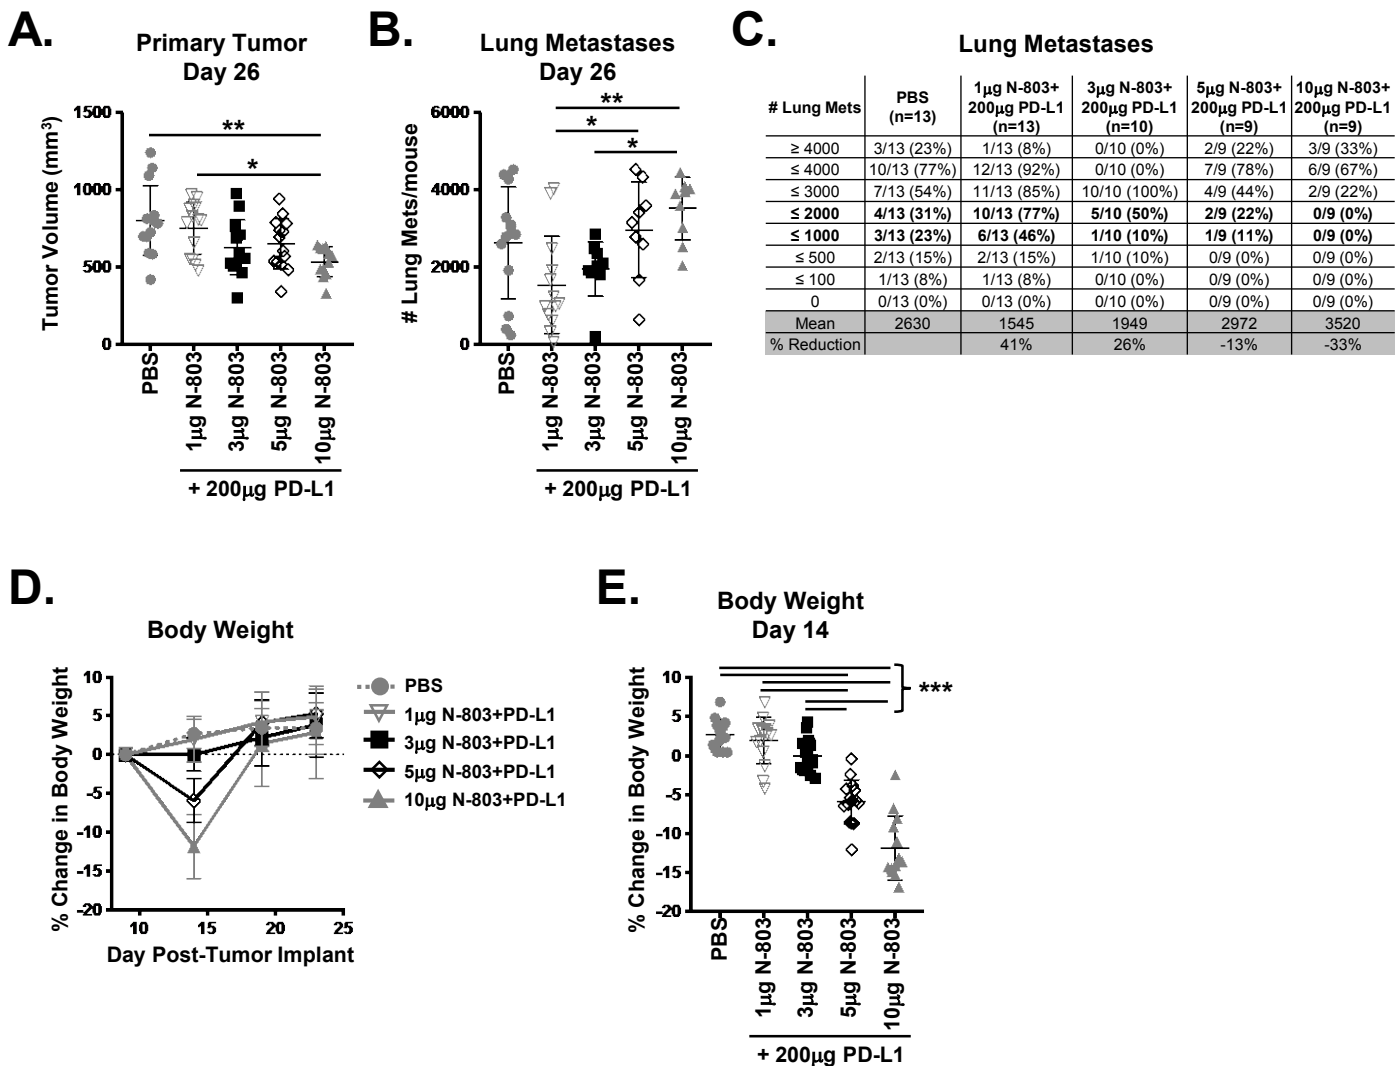

**Figure S2. Dose escalation of N-803 in combination with a clinical relevant dose of  $\alpha$ PD-L1.** Mice were implanted with 4T1 tumors as in Figure 1 and treated at days 9 and 13 with 1µg, 3µg, 5µg, or 10µg N-803 (s.c) and 200µg  $\alpha$ PD-L1 (i.p.) on days 9, 11, and 13. Graphs show tumor volumes of individual mice (**A**) or number of lung metastases in individual mice at day 26 post-tumor implant (**B**) as mean $\pm$ SD. (**C**) Table shows distribution of lung metastases per mouse. (**D-E**) Graphs show % reduction in body weight (versus day 9 pre-treatment) over the course of the experiment (**D**) or of individual mice at day 14 (1 day post-final treatment) (**E**). Data from 1 experiment, n=9-13 mice.

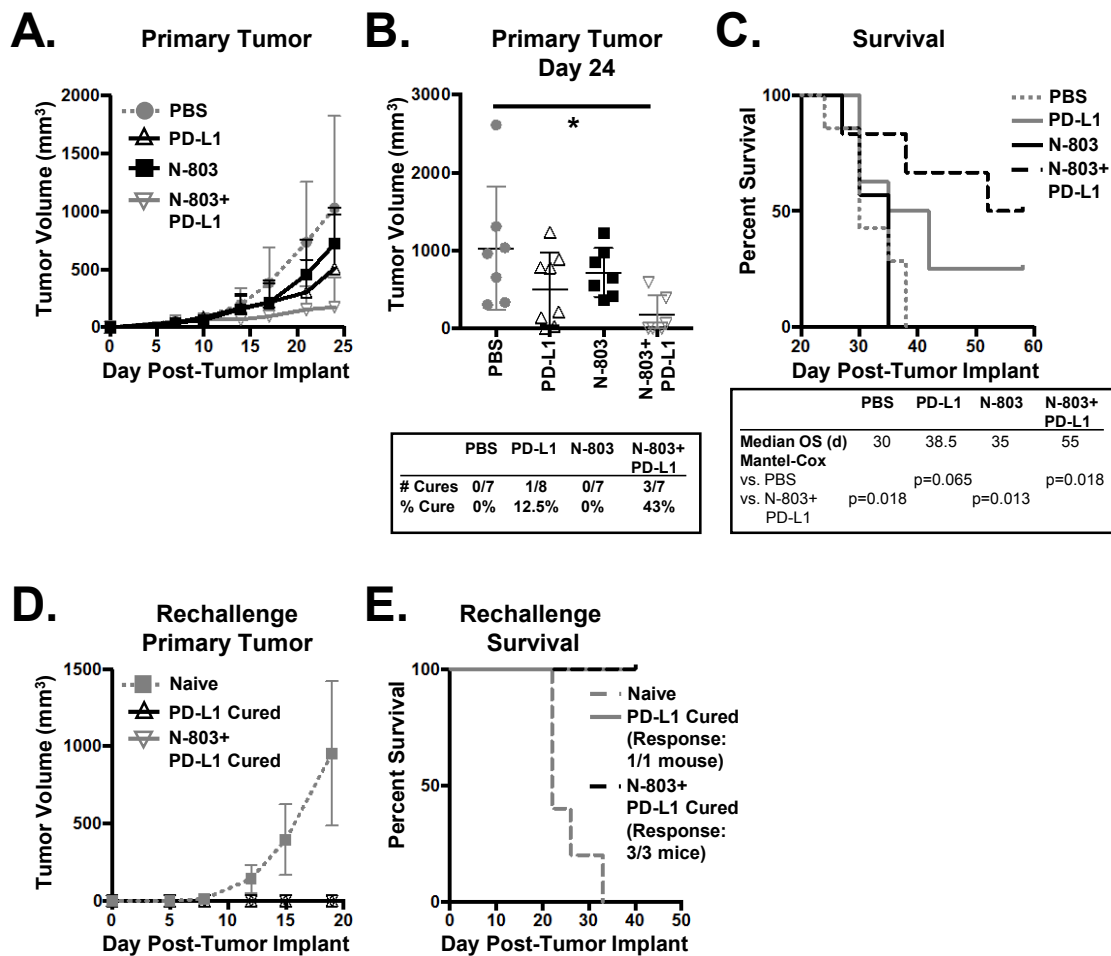

**Figure S3. Combination of N-803+ $\alpha$ PD-L1 reduces MC38-CEA primary tumor burden and increases survival.** (A-C)  $5 \times 10^5$  MC38-CEA tumor cells were implanted into the flank of female C57BL/6-CEA mice. When tumor volumes reached  $\sim 50 \text{ mm}^3$ , mice were treated at days 7 and 11 with  $1 \mu\text{g}$  N-803 (s.c.) and/or  $200 \mu\text{g}$   $\alpha$ PD-L1 (i.p.) on days 7, 9, and 11. Primary tumor growth curves (A) and tumor volumes of individual mice at day 24 (inset: % cured mice) (B) show mean  $\pm$  SD. (C) Survival curves (inset: mOS) show % survival. (D-E) At least 1 month after tumor cure (day 55), cured mice and paired naïve C57BL/6-CEA were implanted with  $5 \times 10^5$  MC38-CEA tumor cells. (D) Primary tumor growth curves show mean  $\pm$  SD. (E) Survival curves (inset: # mice with memory response) show % survival. Data are from 1 independent experiment,  $n=7-8$  mice.

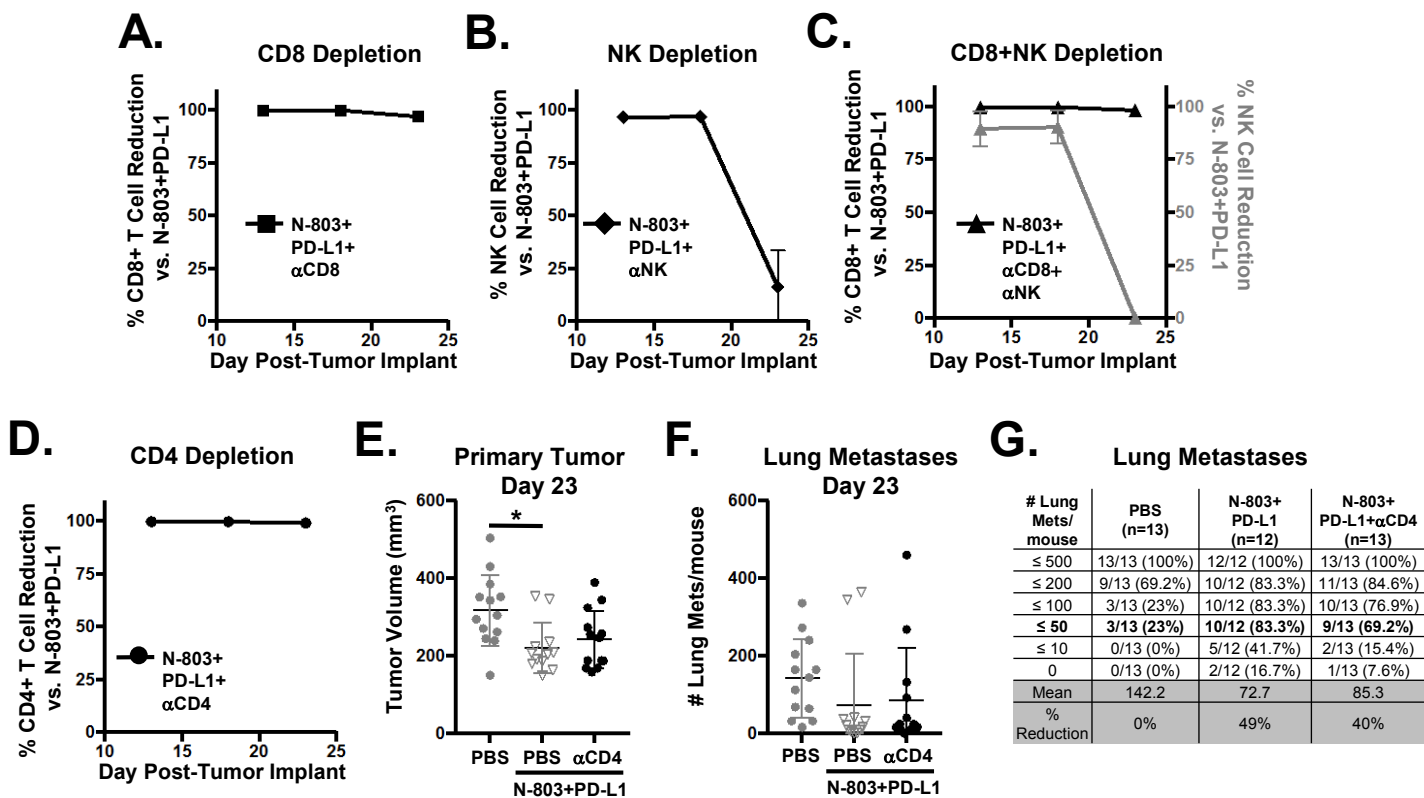

**Figure S4. (A-C) Depletion efficiency of CD8 and NK cell depletions.** Mice were implanted with 4T1 tumors as in Figure 1 and treated at days 13 and 17 with N-803 and  $\alpha$ PD-L1 on days 13, 15, and 17. CD8-expressing cells and NK cells were depleted on days 10, 11, 12, 16, and 19 using 100 $\mu$ g anti-CD8 and/or 25 $\mu$ l anti-asialo-GM1 (i.p.). Depletion efficiency of CD8<sup>+</sup> T cells (**A**), NK cells (**B**), or CD8<sup>+</sup> T and NK cells (**C**) was examined in the blood on days 13, 18, and 23 by flow cytometry. Data combined from 2 independent experiments, n=3 mice/group per experiment. **(D-G) CD4<sup>+</sup> T cells do not contribute to the anti-tumor efficacy of N-803+ $\alpha$ PD-L1 combination.** Mice were implanted with 4T1 tumors as in Figure 1 and treated at days 13 and 17 with N-803 and  $\alpha$ PD-L1 on days 13, 15, and 17. CD4-expressing cells were depleted on days 10, 11, 12, 16, and 19 using 100 $\mu$ g anti-CD4. **(D)** CD4 depletion efficiency in the blood of 3 mice per group was determined on days 13, 18, and 23 by flow cytometry. Graphs show tumor volumes of individual mice **(E)** or number of lung metastases in individual mice at day 23 post-tumor implant **(F)** as mean $\pm$ SD. **(G)** Table shows distribution of lung metastases per mouse. Data from 1 experiment, n=11-13 mice.

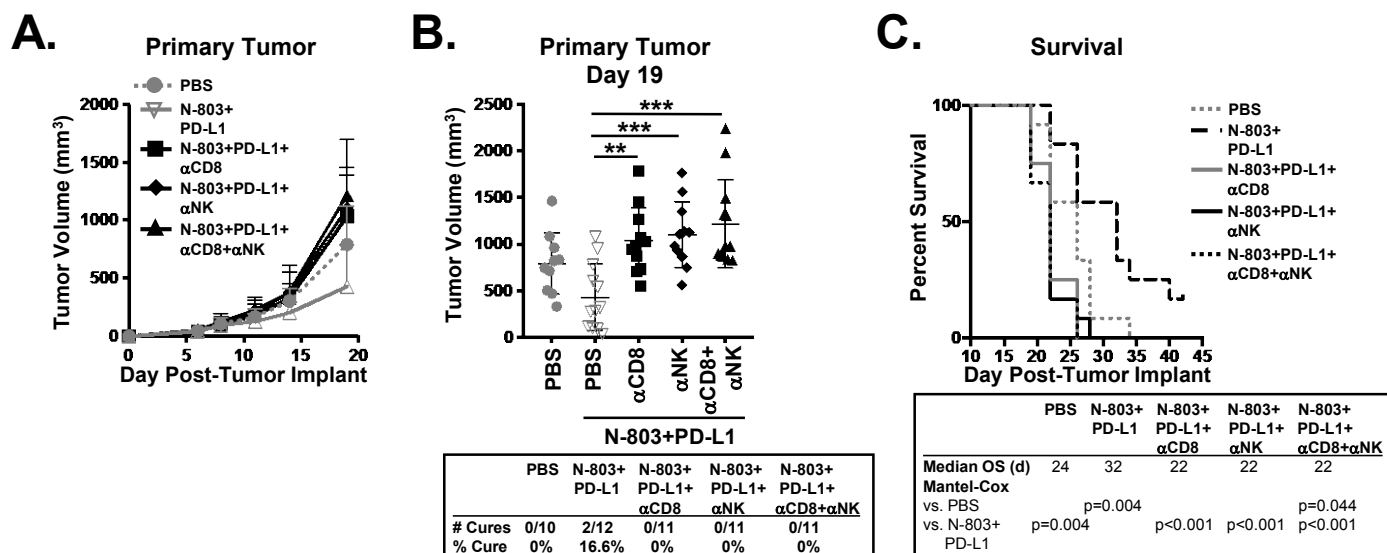

**Figure S5. CD8<sup>+</sup> T cells and NK cells are responsible for MC38-CEA anti-tumor efficacy.**

3x10<sup>5</sup> MC38-CEA tumor cells were implanted into the flank of female C57BL/6-CEA mice. When tumor volumes reached ~50mm<sup>3</sup>, mice were treated at days 8 and 12 with 1μg N-803 (s.c.) and/or 200μg αPD-L1 (i.p.) on days 8, 10, and 12. CD8-expressing cells and NK cells were depleted on days 6, 7, 8, 11, and 14 using 100μg anti-CD8 and/or 25μl anti-asialo-GM1 (i.p.). Primary tumor growth curves (A) and primary tumor volumes of individual mice at day 19 (inset: % cured mice) (B) show mean±SD. (C) Survival curves (inset: mOS) show % survival. Data are from 1 independent experiment, n=10-12 mice.



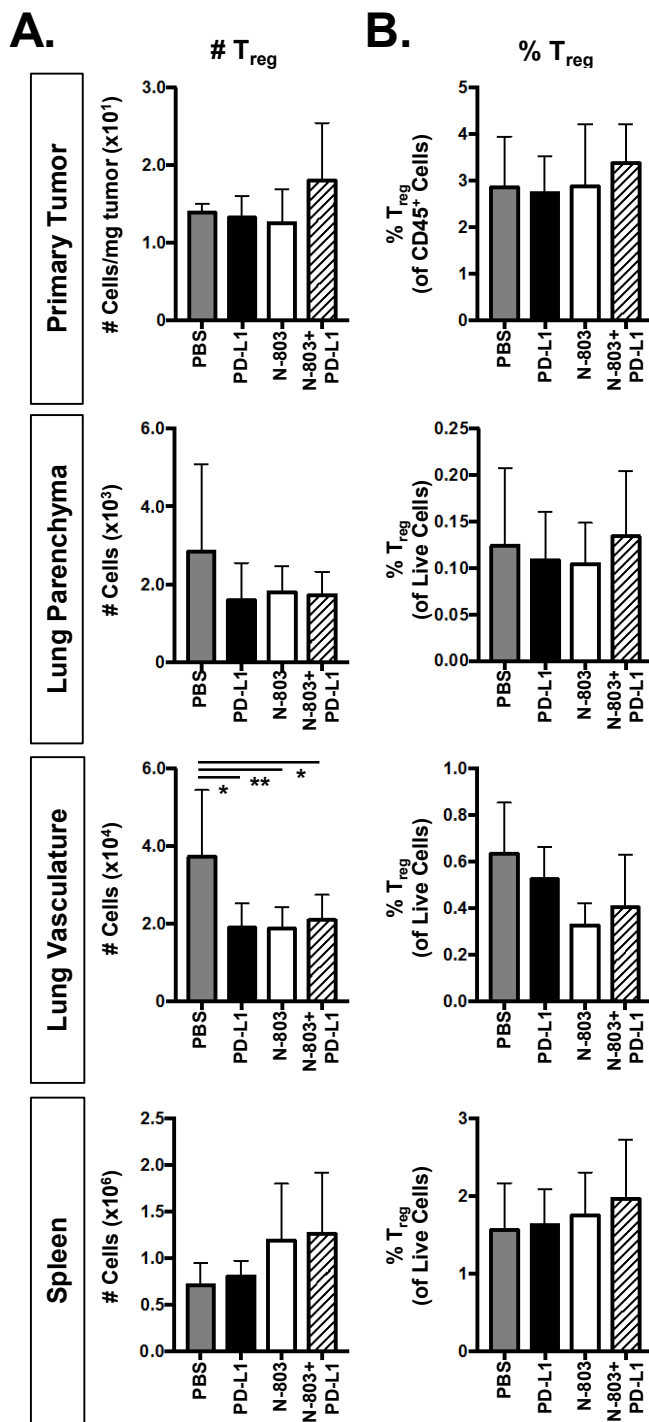

**Figure S6. N-803+ $\alpha$ PD-L1 combination decreases CD4<sup>+</sup> T cell and T<sub>reg</sub> numbers in the lung vasculature.** Mice were implanted with 4T1 tumors as in Figure 1 and treated at days 9 and 13 with N-803 and/or  $\alpha$ PD-L1 on days 9, 11, and 13. Graphs show CD4<sup>+</sup> T<sub>reg</sub> number (**A**) and frequency (**B**) in the primary tumor, lung parenchyma and vasculature, and spleen 24 hours after the last treatment (mean $\pm$ SD). Data combined from 2 independent experiments, n=5 mice/group per experiment.

A.

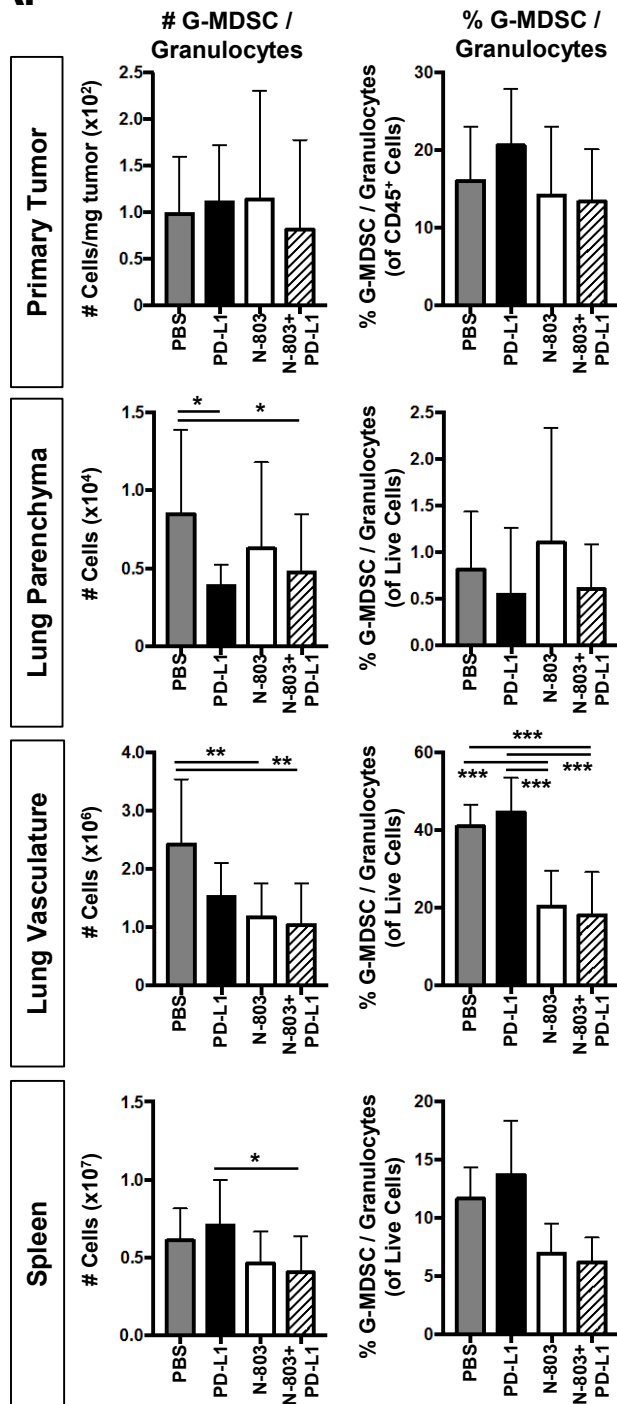

B.

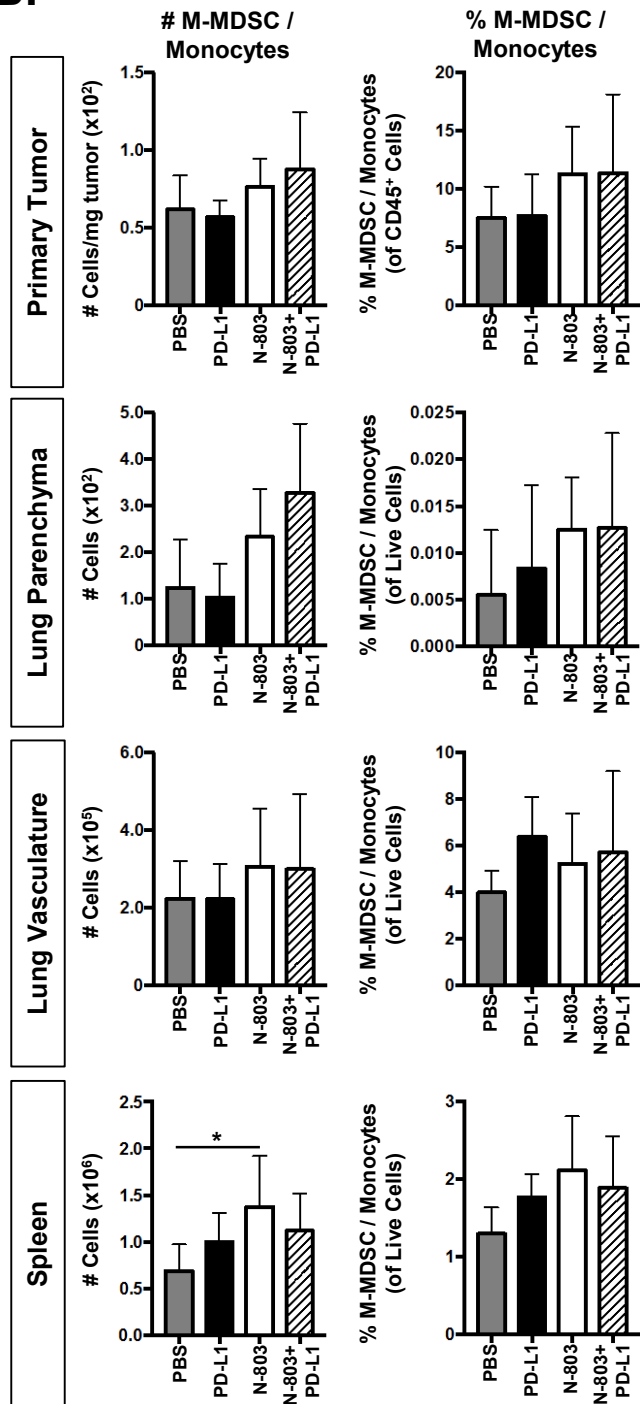

**Figure S7. N-803+αPD-L1 combination reduces G-MDSC numbers in the lung vasculature.** Mice were implanted with 4T1 tumors as in Figure 1 and treated at days 9 and 13 with N-803 and/or αPD-L1 on days 9, 11, and 13. Graphs show G-MDSC/Granulocyte (A) or M-MDSC/Monocyte (B) cell number (left panels) and frequency (right panels) in the primary tumor, lung parenchyma and vasculature, and spleen 24 hours after last treatment (mean±SD). Data combined from 2 independent experiments, n=5 mice/group per experiment.

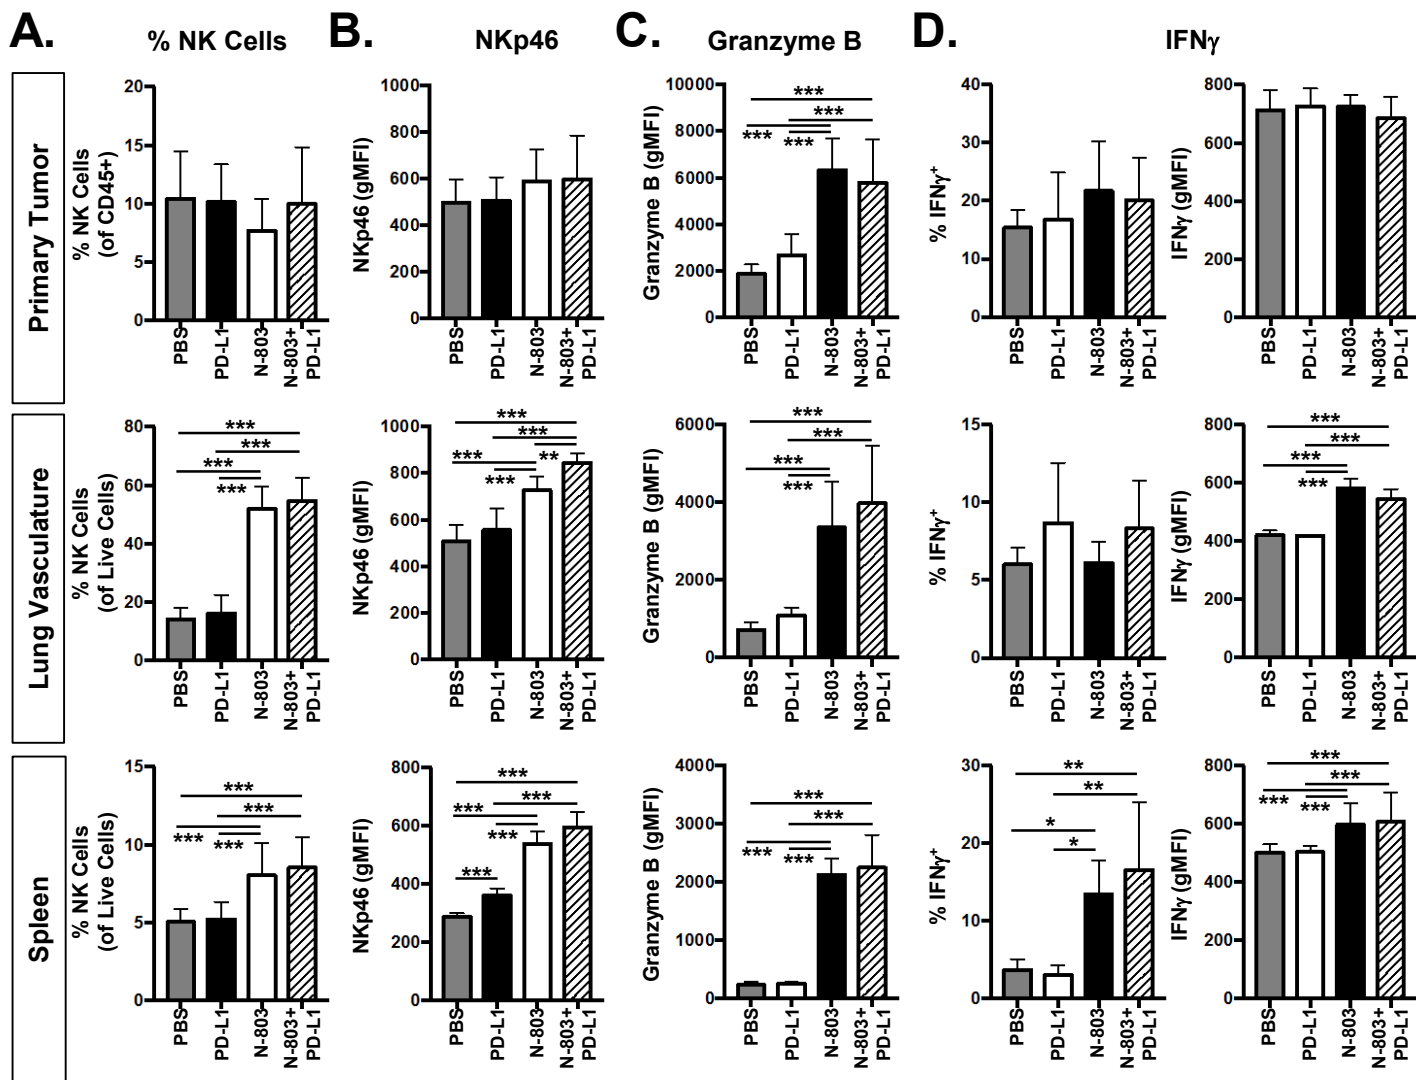

**Figure S8. N-803 monotherapy and combination of N-803+ $\alpha$ PD-L1 promotes an activated NK cell phenotype and increases NK function.** Mice were implanted with 4T1 tumors as in Figure 1 and treated at days 9 and 13 with N-803 and/or  $\alpha$ PD-L1 on days 9, 11, and 13. **(A-C)** NK cells were examined by flow cytometry in the primary tumor, lung vasculature, and spleen 24 hours after the last treatment. Graphs show NK cell frequency **(A)**, expression of NKp46 (gMFI) in NKp46<sup>+</sup> NK cells **(B)**, and expression of Granzyme B (gMFI) in NK cells **(C)**. **(D)** Immune cells were stimulated with 50ng/ml PMA+500ng/ml ionomycin for 4 hours. Graphs show frequency of IFN $\gamma$ <sup>+</sup> NK cells (left panel) and production of IFN $\gamma$  (gMFI) (right panel) by NK cells. All graphs show mean $\pm$ SD. Data combined from 2 independent experiments, n=5 mice/group per experiment.

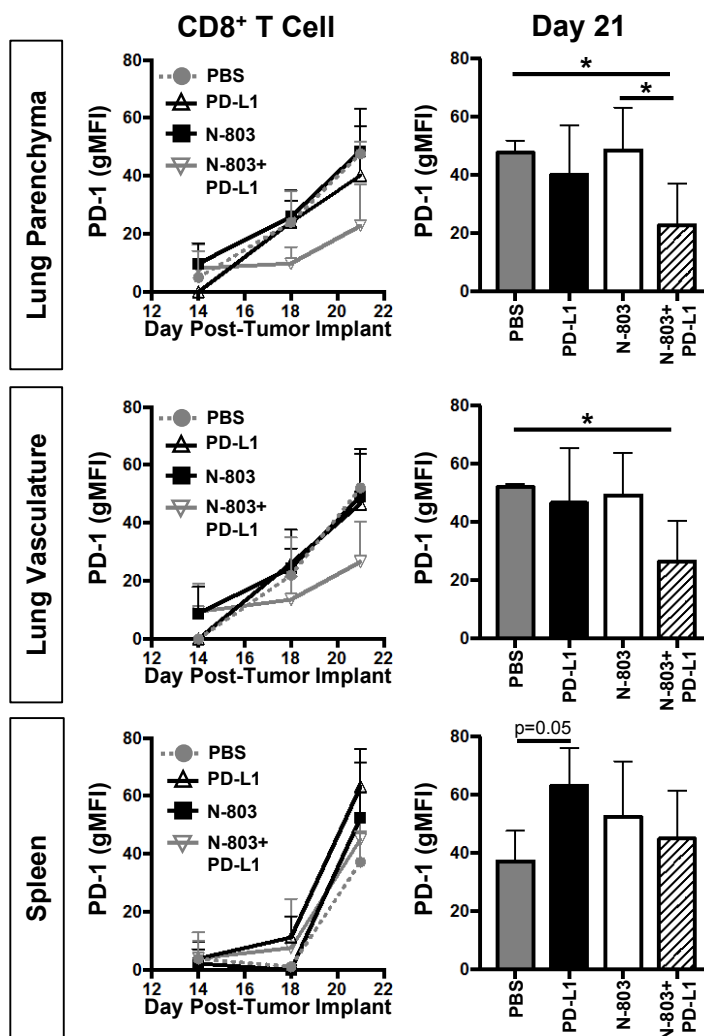

**Figure S9. CD8<sup>+</sup> T cell expression of PD-1 is significantly reduced in lung parenchyma and vasculature after N-803+ $\alpha$ PD-L1 treatment.** Mice were implanted with 4T1 tumors as in Figure 1 and treated at days 9 and 13 with N-803 and/or  $\alpha$ PD-L1 on days 9, 11, and 13. The primary tumor was resected at day 15. CD44<sup>hi</sup> CD8<sup>+</sup> T cells were examined by flow cytometry for PD-1 expression in the lung parenchyma and vasculature and spleen at days 14, 18, and 21. Graphs of PD-1 expression (gMFI) of CD44<sup>hi</sup> CD8<sup>+</sup> T cells at days 14, 18, and 21 (left panels) or day 21 only (right panels) show mean $\pm$ SD. Data are from 1 experiment, n=5 mice.

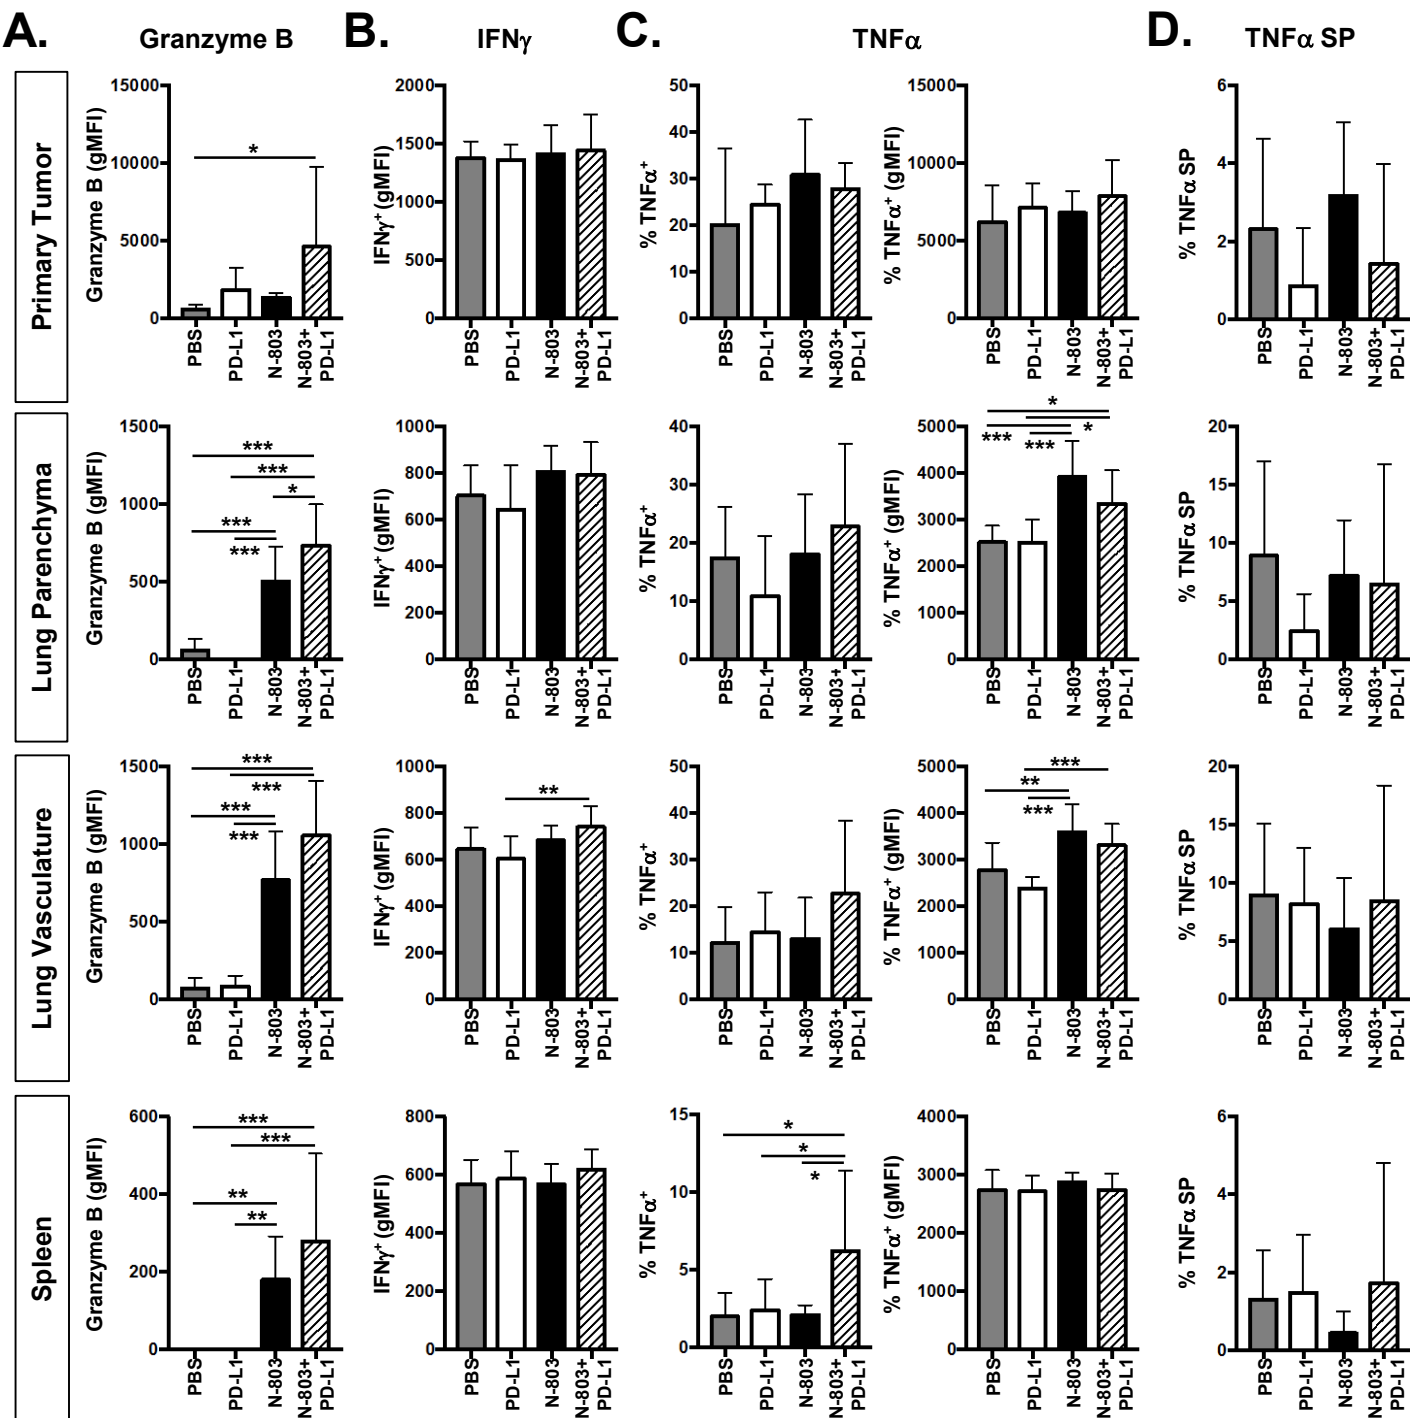

**Figure S10. Combination of N-803+ $\alpha$ PD-L1 increases effector function of CD8<sup>+</sup> T cells.** Mice were implanted with 4T1 tumors as in Figure 1 and treated at days 12 and 16 with N-803 and/or  $\alpha$ PD-L1 on days 12, 14, and 16. CD8<sup>+</sup> T cell effector cytokine and molecule production were examined by flow cytometry in the primary tumor, lung parenchyma and vasculature, and spleen 24 hours after last treatment. **(A)** Graphs show production of Granzyme B (gMFI) by CD44<sup>hi</sup> CD8<sup>+</sup> T cells. **(B-D)** Immune cells were stimulated with 1 $\mu$ g/ml  $\alpha$ CD3+1 $\mu$ g/ml  $\alpha$ CD28 for 4 hours. Graphs show production of IFN $\gamma$  (gMFI) by CD44<sup>hi</sup> CD8<sup>+</sup> T cells **(B)**, frequency of TNF $\alpha^+$  CD44<sup>hi</sup> CD8<sup>+</sup> T cells **(C, left panel)** or production of TNF $\alpha$  (gMFI) by CD44<sup>hi</sup> CD8<sup>+</sup> T cells **(C, right panel)**, or frequency of TNF $\alpha$ -single producing (SP) CD44<sup>hi</sup> CD8<sup>+</sup> T cells **(D)**. All graphs show mean $\pm$ SD. Data combined from 2 independent experiments, n=5 mice/group per experiment.
